# Supplementary material
Source: publisher site journal article supplement (https://www.dovepress.com/article/376107)
Supplement: Supplementary file 1 [file get_supplementary_file.php]

1  
2  
3  
4  
5  
6  
7  
8  
9  
10  
11  
12  
13  
14  
15  
16  
17

**Supplement to:**  
**Effectiveness of mammography screening on breast cancer mortality - a study protocol for emulation of target trials using German health claims data**

**Contents**

|   |                                                                            |    |
|---|----------------------------------------------------------------------------|----|
| 1 | Details on the statistical analysis.....                                   | 2  |
| 2 | Illustration of assignment to screening strategies .....                   | 4  |
| 3 | Illustrations of artificial censoring schemes per screening strategy ..... | 5  |
| 4 | Addressing potential sources of bias.....                                  | 8  |
| 5 | Illustration of causal considerations for covariate selection .....        | 11 |
| 6 | List of covariates.....                                                    | 12 |
| 7 | References.....                                                            | 14 |

## 18 1 Details on the statistical analysis

19 Discrete-time cumulative incidence functions (CIFs) will be estimated using the following approach. Let  
 20  $A_{never}$  (reference),  $A_{once}$ , and  $A_{regular}$  be indicator variables for the screening strategies “never  
 21 screened”, “screened at least at baseline”, and “screened at baseline and every two years afterwards”.  
 22 The discrete-time (cause specific) hazard is modelled using pooled logistic regression adjusted for  
 23 baseline covariates:

$$\begin{aligned}
 24 \quad & \text{logit} \left( \mathbb{P}(Y_{t+1} | \bar{Y}_t = 0, \bar{C}_t = 0, \bar{D}_t = 0, A_{once}, A_{regular}, X) \right) \\
 25 \quad & = f_1(\theta'_1, t) + f_2(\theta'_2, t, A_{once}) + f_3(\theta'_3, t, A_{regular}) + \theta_4 A_{once} + \theta_5 A_{regular} + \theta'_6 X'.
 \end{aligned}$$

26 The above model includes flexible functions  $f(\cdot)$  of time  $t$ , regression coefficients  $\theta$  for (transformed)  
 27 time and, possibly, interaction terms between time and screening strategy. The functions  $f(\cdot)$  will be  
 28 determined by visual inspection so that the unadjusted parametric CIF estimated via pooled logistic  
 29 modelling approximates the non-parametric Aalen-Johansen curves reasonably well. The binary  
 30 variable  $Y_t$  denotes the outcome event breast cancer death at time  $t$ . The binary variable  $C_t$  denotes  
 31 censoring status at time  $t$  and the binary variable  $D_t$  contains the event status of the competing event  
 32 (death by other causes) at time  $t$ . Baseline covariates and interactions between covariates are denoted  
 33 by  $X$ . The prime notation  $(\cdot)'$  denotes vectors. The history of a variable is denoted by overbars as  $\bar{(\cdot)}$ .  
 34 The above model is a marginal structural model and contains baseline covariates, but no time-varying  
 35 covariates. Adjustment for time-varying confounding by  $X_t$  is achieved by inverse probability  
 36 weighting, where time-varying weights are calculated for each screening strategy  
 37  $A \in \{A_{never}, A_{once}, A_{regular}\}$  separately as

$$38 \quad W_t^A = \prod_{k=1}^t \frac{1}{\hat{\mathbb{P}}(A_k | \bar{A}_{k-1}, \bar{X}_k, \bar{Y}_{k-1} = \bar{C}_{k-1} = 0)},$$

39 truncating weights at the 99<sup>th</sup> percentile. Here  $A_k$  is the actual screening status at time  $k$  and is, by  
 40 definition, consistent with the strategy  $A$  as individuals will otherwise be censored. For efficiency the  
 41 above weights can be replaced by stabilized weights (see Cain et al. (2010) for a description of  
 42 stabilized weights). Analogous weights are used for censoring due to competing events when  
 43 estimating the direct effect. Below, upper indices refer to counterfactuals, e.g. the probability of breast  
 44 cancer death under screening even if a portion of the study subjects did not experience screening, i.e.  
 45 exposure is set to a value possibly contrary to the observed exposure (Hernan & Robins, 2020). The  
 46 cumulative incidence function  $\widehat{CIF}_{i,t}^{A=a}$  for clone  $i = 1, \dots, m$ , at time point  $t$  under screening strategy  
 47  $A = a$  will then be estimated using one of the approaches (i.e. based on modelling either  
 48 subdistribution or cause-specific hazard) described in Young et al. (2020), depending on computational

49 cost. This cumulative incidence will be standardized to the empirical distribution of baseline  
50 confounders as

51 
$$\widehat{CIF}_t^{A=a} = \frac{1}{m} \sum_{i=1}^m \widehat{CIF}_{i,t}^{A=a}.$$

52 As a function of time  $t$ , the above cumulative incidence function allows an assessment of how the  
53 effect of screening evolves over the whole of follow-up.

54

55 2 Illustration of assignment to screening strategies

56

- S: screening in 1<sup>st</sup> quarter
- C: breast cancer diagnosis in 1<sup>st</sup> quarter
- D: death in 1<sup>st</sup> quarter
- S&C: screening & breast cancer diagnosis in 1<sup>st</sup> quarter
- S&D: screening & death in 1<sup>st</sup> quarter

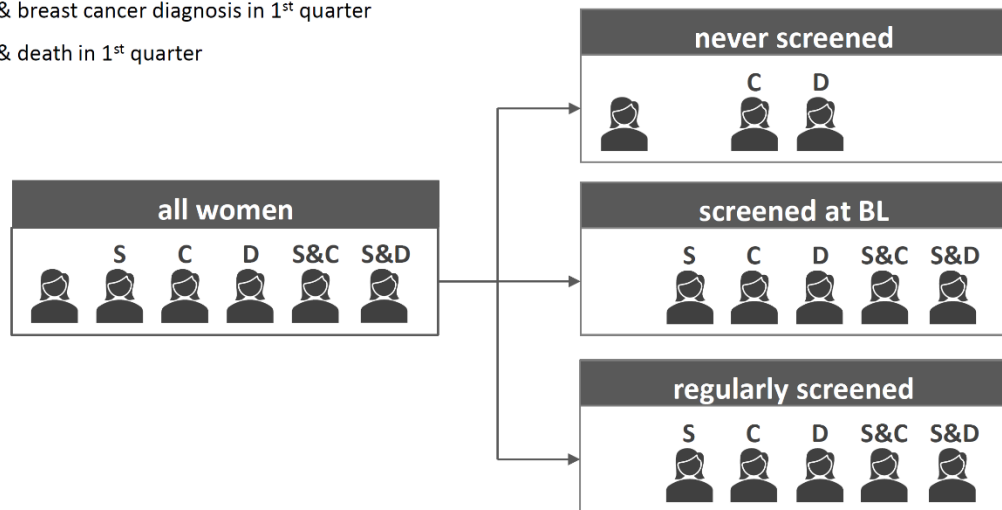

57

**Figure S1:** Illustration of cloning of women into the screening strategies. Assignment of clones to screening strategies is based on screening behaviour from the calendar quarter of baseline. Women with a breast cancer diagnosis or recorded death in the first quarter are cloned into all screening strategies, since they were compliant with all screening strategies until the diagnosis/death occurred.

58

59 3 Illustrations of artificial censoring schemes per screening strategy

60

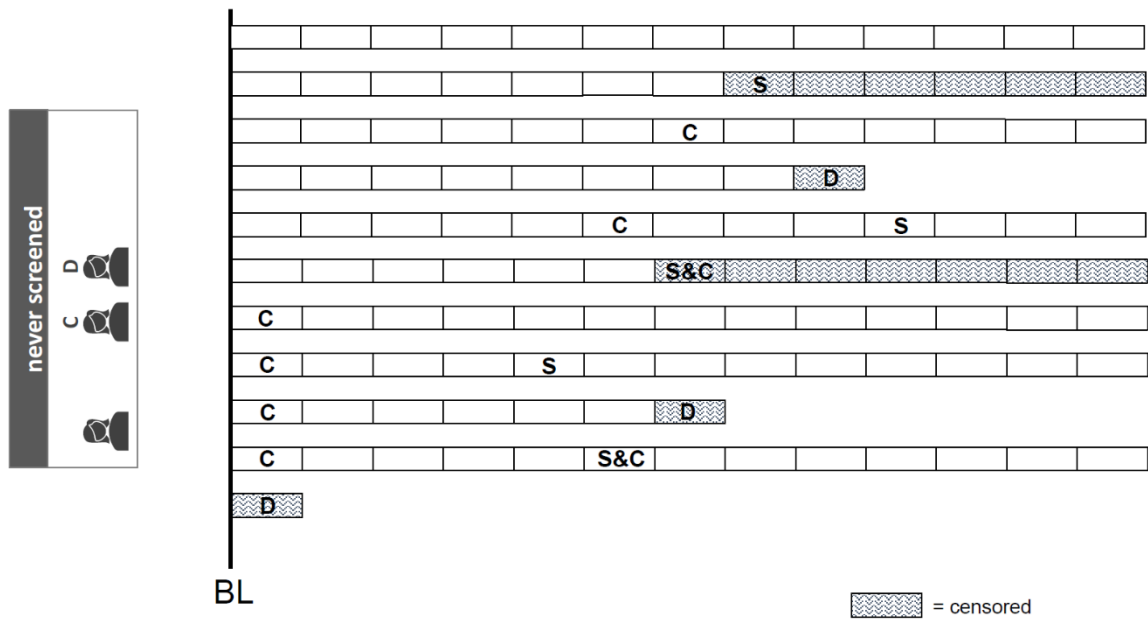

61

Figure S2: Illustration of artificial censoring scheme under screening strategy “never screened”. Follow-up time is discretized into calendar quarters, with rectangles denoting individual quarters. The rationale for censoring is described in depth in the main body of the paper. Note that when a woman is censored, the time of censoring is set to the beginning of the calendar quarter that led to censoring. In the above illustration, the last woman is censored at baseline because she dies in the baseline quarter, i.e. she is censored at time point 0 with reason of censoring being death. C = breast cancer, D = death, S = screening, S&C = screening and cancer in the same quarter.

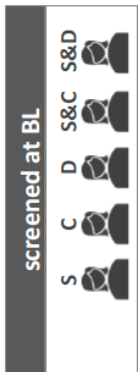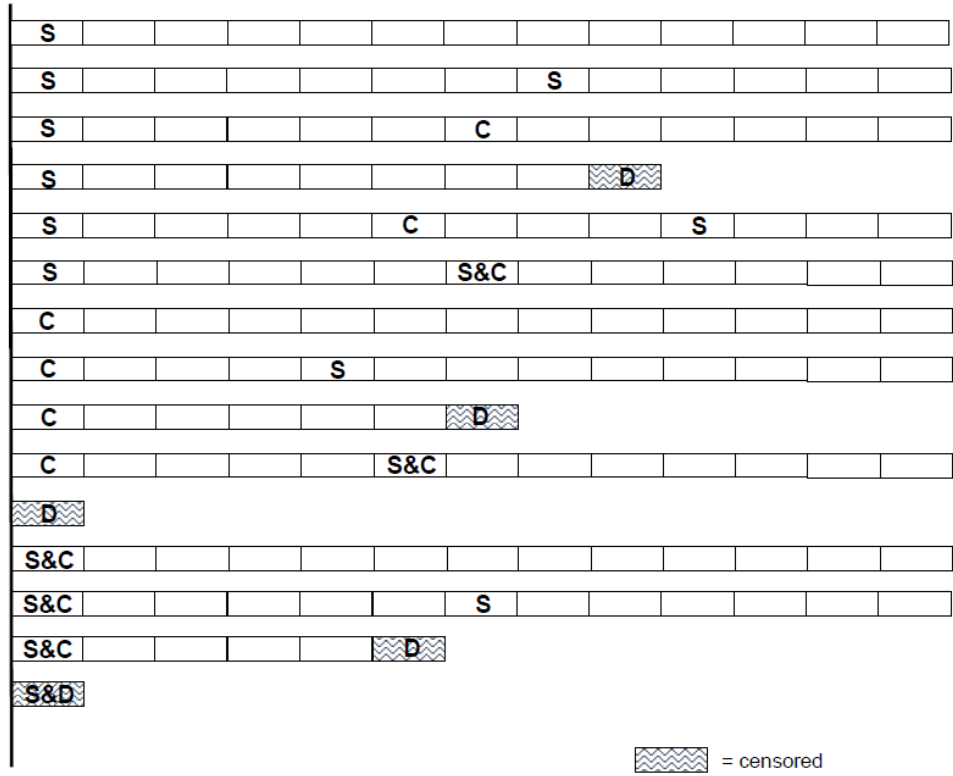

62

BL

63

Figure S3: Illustration of artificial censoring scheme under screening strategy “screened at baseline”. Follow-up time is discretized into calendar quarters, with rectangles denoting individual quarters. The rationale for censoring is described in depth in the main body of the paper. C = breast cancer, D = death, S = screening, S&C = screening and cancer in the same quarter, S&D = screening and death in the same quarter.

64

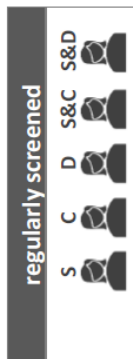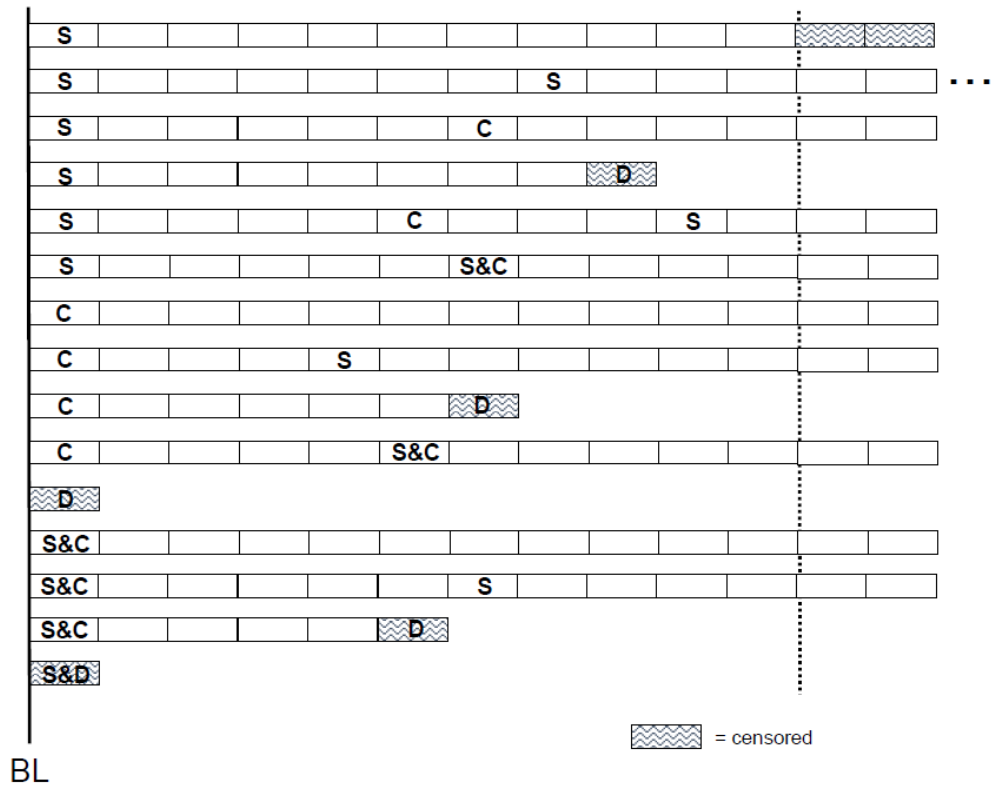

65

**Figure S4:** Illustration of artificial censoring scheme under screening strategy “regularly screened every two years”. Follow-up time is discretized into calendar quarters, with rectangles denoting individual quarters. A regular screening is defined as having taken place between one year to ten quarters after the previous screening. The rationale for censoring is described in depth in the main body of the paper. C = breast cancer, D = death, S = screening, S&C = screening and cancer in the same quarter, S&D = screening and death in the same quarter. The dotted line indicates the end of the time period in which the second screening would need to take place.

66

67

## 68 4 Addressing potential sources of bias

69 *Confounding:* Covariates used to adjust for confounding will be derived at baseline and during follow-  
70 up. Their selection is based on subject matter knowledge and available literature. Risk factors for  
71 breast cancer were considered relevant, even though the outcome variable is breast cancer mortality,  
72 since developing breast cancer is a necessary antecedent for breast cancer death. Figure S5 illustrates  
73 the causal considerations for covariate selection. Adjustment for confounding will be carried out via  
74 standardization and inverse probability weighting.

75 Given that claims data are not collected for research purposes, direct information on relevant  
76 confounders is not always available or only available for extreme cases (e.g. heavy smoking, alcohol  
77 abuse). We aim to minimize this problem by using indirect information on these confounders (e.g.  
78 diseases resulting from exposure to these risk factors such as smoking-related diseases, or diseases  
79 resulting mainly from unhealthy behaviour such as obesity) as well as proxy variables for a health-  
80 seeking behaviour (e.g. utilization of preventive services, educational attainment). With respect to  
81 family history of breast cancer, the information is restricted to the ICD-10-GM code Z80.3 (“malignant  
82 neoplasm of the breast in the family”). It is not clear whether it is primarily coded in patients with a  
83 hereditary breast cancer syndrome rather than in those with a “simple” family history. The observed  
84 low proportion of women with Z80 codes (Braitmaier et al. 2022) indicates that it might only be used  
85 in high-risk subjects who would not be the target group of normal MSP screening. We therefore plan  
86 to conduct sensitivity analyses excluding women with this code. In addition, we will conduct a  
87 quantitative bias analysis to estimate the impact of unmeasured confounding regarding a “simple”  
88 family history of breast cancer.

89 For some risk factors, no information will be available in our data, for example age at menarche, parity,  
90 age at first full-term pregnancy, breastfeeding, age at menopause, height, breast density, exposure to  
91 radiation (unrelated to mammography). However, we argue that these risk factors are relatively  
92 unknown to the public and it is therefore reasonable to assume that they do not influence the decision  
93 to undergo screening.

94 *Healthy screenee bias:* Individuals volunteering for screening are generally healthier than individuals  
95 who choose not to undergo screening (Weiss & Rossing 1996). In addition to adjustment for  
96 confounding, we will address this specific issue by carrying out a subgroup analysis within screening-  
97 affine women, defined by their pre-baseline use of other preventive services (research question 2).  
98 This subpopulation is more homogenous regarding health seeking behaviour, and we expect an  
99 increased internal validity albeit at the cost of generalizability. Therefore, both effects, the one in the



100 full study sample and the one in the subgroup of screening-affine women, will be important for the  
101 evaluation of the screening programme.

102 *Competing events:* Death due to causes other than breast cancer is a competing event for the outcome  
103 of interest. We will compare the total effect (where death due to other causes is not treated as  
104 eliminable) with the direct effect of screening (where the competing event is treated as eliminable and  
105 thus censored with appropriate inverse probability of censoring weights, IPCW). Note that adjustment  
106 for confounding of the direct effect must also include common causes of the competing event and the  
107 study outcome, e.g. by including comorbidities (Young et al. 2020).

108 *Time-related biases:* Immortal time and other biases will be minimized by aligning eligibility checks and  
109 treatment assignment at time zero, i.e. baseline (Dickerman et al. 2019). Furthermore, women whose  
110 screening behaviour in the first quarter after trial start is consistent with more than one screening  
111 strategy will be copied and one clone will be assigned to each eligible screening strategy, i.e. women  
112 who undergo screening in the baseline quarter will be assigned to all active screening strategies. An  
113 alternative, but less efficient approach would be to randomly assign each person to exactly one of the  
114 eligible strategies (Garcia-Albeniz et al. 2020). Given that some information in the database used for  
115 this study is only available on a quarterly basis (e.g. outpatient diagnosis codes), it is impossible to  
116 break down the information into smaller time intervals than quarters. However, the length of follow-  
117 up required to observe the effect of screening is large (approx. 7 - 10 years) (Jatoi & Miller 2003). We  
118 therefore argue that the extent of bias due to the time units is negligible, as a delay of diagnosis of  
119 three months is unlikely to influence the screening effect.

120 *Misclassification:* Health claims data is primarily generated for reimbursement purposes and,  
121 therefore, some diagnosis codes might be used inappropriately for the underlying condition or over-  
122 used (e.g. diagnosis codes in the outpatient setting). To minimize misclassification, we define most of  
123 the diseases based on algorithms that, for example, combine different sources of information (e.g.  
124 diagnosis codes in combination with therapy), only use codes with a high validity (such as inpatient  
125 diagnosis codes) or only consider codes if recorded repeatedly. There may still be some  
126 misclassification of morbidity, but we consider this type of misclassification unlikely to differ between  
127 groups and negligible in our analysis. Risk factors that have a delayed impact on breast cancer may not  
128 be measured adequately due to a limited length of the available look-back period. For instance, HRT  
129 might influence breast cancer risk only after several years. Thus, a woman who stopped HRT treatment  
130 five years before baseline would be misclassified as “no HRT use” if her look-back period in the data is  
131 only three years. We will systematically describe the available look-back period (stratified by age at  
132 baseline) to assess whether this could be a relevant misclassification. Finally, misclassification of the  
133 outcome variable of breast cancer related deaths might occur since this variable is not directly

134 available for much of the data and must be derived based on an algorithm. Langner et al. (2019)  
135 reported a sensitivity of 91.3 % and a specificity of 97.4 % for a former version of this algorithm, which  
136 is currently being further optimized and will be validated again based on a sample for which the official  
137 cause of death is available.

138 *Identifying assumptions:* We make the usual assumptions for causal inference from observational data,  
139 namely consistency, sequential exchangeability given observed covariates, and positivity. Consistency  
140 is fulfilled when the screening strategies being assessed are well-defined and correspond to the  
141 screening behaviour observed in the data, e.g. the outcome for a woman who happens to never  
142 undergo screening is the same as if she had been assigned to never undergo screening in the target  
143 trial. Sequential exchangeability is fulfilled when the observed screening behaviour of a woman at time  
144  $t$  is independent of her potential outcomes under the strategies given the measured covariates prior  
145 to  $t$ ; this can be thought of as no unmeasured baseline or time-varying confounding. Positivity is  
146 fulfilled when the probability of observing a screening strategy is greater than zero for all strategies in  
147 all covariate strata (Young et al. 2020, Hernan & Robins 2020). Furthermore, censoring competing  
148 events to obtain the direct effect requires an assumption of no unmeasured common causes of the  
149 different event types.

150

151 5 Illustration of causal considerations for covariate selection

152

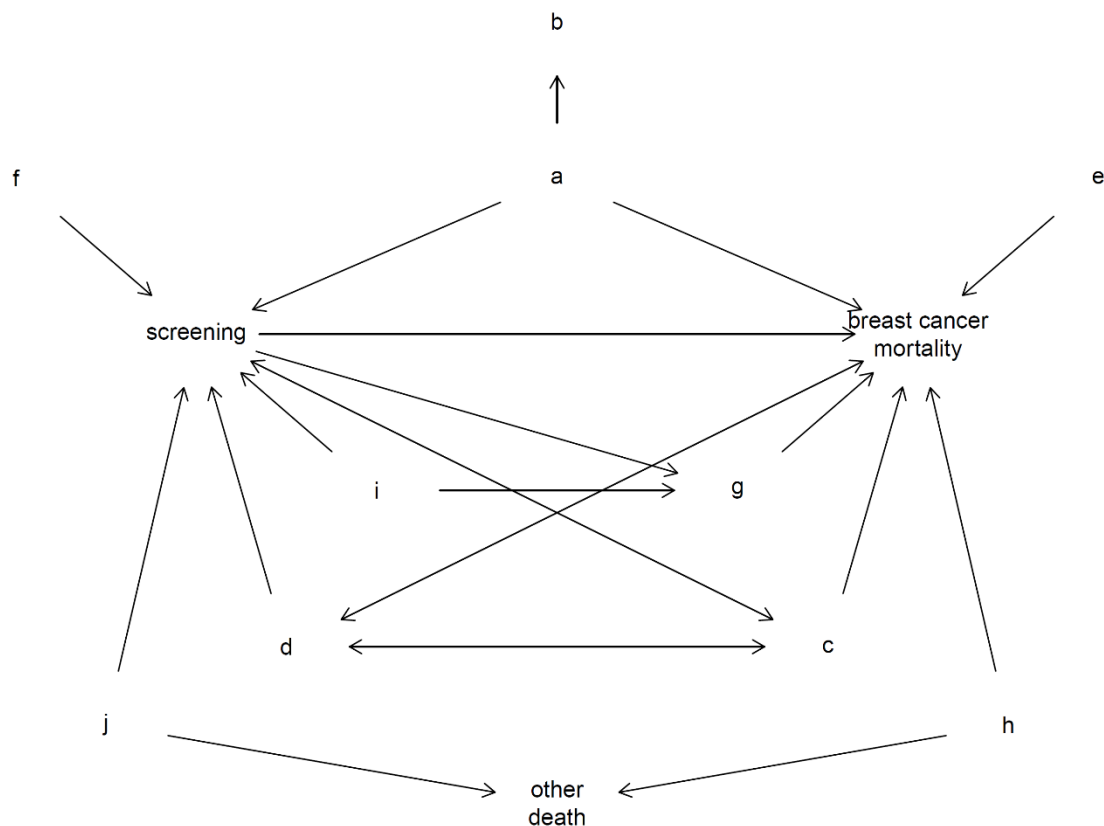

153

154

**Figure S5:** Illustration of variable groups considered for covariate adjustment and their causal connections. Note that this is a simplified graph, ignoring the longitudinal aspect of the study. A directed edge from one variable to another means that the first variable is a direct cause of the second. Screening is the exposure, breast cancer death is the outcome, and other death is a competing event. A bi-directed edge can be interpreted as presence of latent variables between the two connected variables. Variables “a” are common causes of screening and outcome. Variables “b” are proxies for those of category “a”. Variables “c” are causes of the outcome that are associated with exposure. Variables “d” are causes of the exposure that are associated with the outcome. Variables “e” are causes of the outcome that are not associated with exposure. Variables “f” are causes of the exposure that are not associated with the outcome. Variables “g” are post-screening variables that are mediators between exposure and outcome. Variables “h” have a causative effect both on the competing event and the outcome. Variables “i” are causes of exposure and mediators. Variables “j” are confounders between exposure and the competing event. Variables “f” should not be included for adjustment, as this can lead to bias-amplification in case of residual unobserved confounding. Variables “g” (e.g. treatment after screening) should not be included for adjustment, as they are on the causal path from exposure to outcome. Variables “a”, “b” (if “a” is unmeasured), “c”, “d”, “h” (only for estimating the direct effect, not for the total effect), “i”, and “j” should be included for adjustment to mitigate confounding. Variables “e” are not needed for adjustment but can be included to increase precision of estimation. The variable groups (except “f”) are not mutually exclusive, and in fact many variables will fit into more than one of these groups. An example of a covariate of the category “a” would be previous use of menopausal hormone therapy, as this is a known risk factor for breast cancer and physicians might advise women with this risk factor to attend screening. An example of a covariate of the category “j” would be presence of palliative care. An example for “d” might be educational attainment as it may affect awareness of screening and is strongly associated with direct risk factors “c” of breast cancer mortality; educational attainment can also be seen as type “b” proxy for further unmeasured confounders.

155

156 **6 List of covariates**

157 In Table S1 below, we give an overview of variables used to adjust for confounding. Time-varying  
 158 covariates will be re-assessed on a quarterly basis. Variables might be added to this list of covariates,  
 159 if indicated by subject matter knowledge. The list of covariates used in the final analysis will be finalized  
 160 before data on the study outcome becomes available. Note that this is just an alphabetical list of  
 161 covariates that will be defined based on the information in the database. Content-wise, a discussion  
 162 on how confounding as a potential source of bias is considered and how relevant covariates are  
 163 captured in the data is provided in Supplement 4. Furthermore, Figure S5 illustrates the causal  
 164 considerations for covariate selection.

165 The covariates in Table S1 are mostly implemented as binary (time-dependent) variables. For most of  
 166 the variables, algorithms considering different types of information (e.g. diagnosis codes in  
 167 combination with therapy) will be developed or have been developed, with the aim of maximizing  
 168 validity and thus minimizing misclassification (see also Supplement 4).

169 **Table S1:** Relevant covariates for confounder adjustment.

| <b>variable/variable group</b>                                                                                                                    | <b>time-varying</b> |
|---------------------------------------------------------------------------------------------------------------------------------------------------|---------------------|
| Acute hemorrhagic stroke                                                                                                                          | yes                 |
| Acute ischemic stroke                                                                                                                             | yes                 |
| Acute myocardial infarction                                                                                                                       | yes                 |
| Age at baseline                                                                                                                                   | no                  |
| Alcohol abuse                                                                                                                                     | yes                 |
| Anaemia                                                                                                                                           | yes                 |
| Anticoagulant therapy                                                                                                                             | yes                 |
| Antihypertensive therapy                                                                                                                          | yes                 |
| Antiplatelet therapy                                                                                                                              | yes                 |
| Benign neoplasm of breast                                                                                                                         | yes                 |
| Breast disorders (benign mammary dysplasia, inflammatory disorders of breast, hypertrophy of breast, unspecified lump in breast, other disorders) | yes                 |
| Bronchial asthma                                                                                                                                  | yes                 |
| Cachexia                                                                                                                                          | yes                 |
| Chronic obstructive pulmonary disease (COPD)                                                                                                      | yes                 |
| Coronary heart disease                                                                                                                            | yes                 |
| Dementia                                                                                                                                          | yes                 |
| Diabetes with end organ damage                                                                                                                    | yes                 |
| Drug abuse                                                                                                                                        | yes                 |
| Drug-treated (arterial) hypertension                                                                                                              | yes                 |
| Educational attainment                                                                                                                            | no                  |
| Family history of breast cancer*                                                                                                                  | yes                 |
| Glaucoma                                                                                                                                          | yes                 |
| Heart failure                                                                                                                                     | yes                 |
| Hemiplegia                                                                                                                                        | yes                 |
| Hepatitis B or C                                                                                                                                  | yes                 |
| Hip fracture                                                                                                                                      | yes                 |
| HIV therapy                                                                                                                                       | yes                 |

|                                                  |     |
|--------------------------------------------------|-----|
| Hormone replacement therapy                      | yes |
| Lipid-lowering therapy                           | yes |
| Liver diseases including chronic viral hepatitis | yes |
| Mental diseases                                  | yes |
| Number of hospitalizations                       | yes |
| Number of non-screening mammographies            | yes |
| Number of outpatient physician contacts          | yes |
| Number of prescriptions                          | yes |
| Number of screening mammographies                | yes |
| Obesity/adiposity                                | yes |
| Other cancers                                    | yes |
| Palliative care                                  | yes |
| Severe liver disease                             | yes |
| Terminal renal disease                           | yes |
| Tobacco abuse                                    | yes |
| Treated diabetes                                 | yes |
| Treatment for hypothyroidism                     | yes |
| Treatment for osteoporosis                       | yes |
| Treatment with antidepressants                   | yes |
| Treatment with antipsychotics                    | yes |
| Treatment with immunosuppressive drugs           | yes |
| Treatment with opioids                           | yes |

170 \* Given that information on family history is limited, additional methods will be taken to consider  
171 this confounder (see manuscript and Supplement 4).

172

173 7 References

174 Braitmaier M, Sarina S, Kollhorst B, et al. (2022) Screening colonoscopy similarly prevented distal and  
175 proximal colorectal cancer; A prospective study among 55-69-year-olds; Journal of Clinical  
176 Epidemiology; 149: 118-126

177 Cain LE, Saag MS, Petersen M, et al. (2016) Using observational data to emulate a randomized trial of  
178 dynamic treatment-switching strategies: an application to antiretroviral therapy; Int J Epidemiol;  
179 45(5):2038-2049

180 Dickerman BA, Garcia-Albeniz X, Logan RW, et al. (2019) Avoidable flaws in observational analyses: an  
181 application to statins and cancer; Nat Med; 25(10): 1601 – 1606

182 Garcia-Albeniz X, Hernan MA, Hsu J (2020) Continuation of annual screening mammography and breast  
183 cancer mortality in women older than 70 years; Ann Intern Med; 173(3): 247

184 Hernan MA, Robins JM (2020) Causal Inference – What If. Boca Raton, FL: Chapman & Hall/CRC

185 Jatoi I, Miller AB (2003) Why is breast cancer mortality declining?; Lancet Oncol; 4(4): 251 – 254

186 Langner I, Ohlmeier C, Haug U (2019) Implementation of an algorithm for the identification of breast  
187 cancer deaths in German health insurance claims data: a validation study based on record linkage with  
188 administrative mortality data; BMJ Open; 9(7): e026834

189 Weiss NS, Rossing MA (1996) Healthy screenee bias in epidemiological studies of cancer incidence;  
190 Epidemiology; 7(3): 319 – 322

191 Young JG, Stensrud MJ, Tchetgen Tchetgen EJ, et al. (2020) A causal framework for classical statistical  
192 estimands in failure-time settings with competing events; Statistics in Medicine; 39(8): 1199 – 1236

193

194

195
